# Supplementary material for: Synthesis, characterization and diode application of poly(4-(1-(2-phenylhydrazono)ethyl)phenol)
Source: Royal Society of Chemistry journal article supplement (doi:10.1039/c5tc00857c), 2015-01-01
Supplement: c5tc00857c1.pdf [file c5tc00857c1.pdf]

## Supplementary Information

# Synthesis, characterization and diode application of poly(4-(1-(2-phenylhydrazono)ethyl)phenol)

Hacı Ökkeş Demir,<sup>†a</sup> Kadem Meral,<sup>b</sup> Şakir Aydoğan,<sup>c</sup> Mehmet Sait Bozgeyik<sup>d</sup>  
and Erdal Bayır<sup>e</sup>

- <sup>a.</sup> Kahramanmaraş Sütçü İmam University, Faculty of Science and Arts, Department of Chemistry, TR-46050 Kahramanmaraş, Turkey.
- <sup>b.</sup> Atatürk University, Faculty of Science, Department of Chemistry, Erzurum, Turkey.
- <sup>c.</sup> Atatürk University, Faculty of Science, Department of Physics, Erzurum, Turkey.
- <sup>d.</sup> Kahramanmaraş Sütçü İmam University, Faculty of Science and Arts, Department of Physics, TR-46050 Kahramanmaraş, Turkey.
- <sup>e.</sup> Kahramanmaraş Sütçü İmam University, Afşin Vocational School, Department of Chemistry and Chemical Processing Technologies, TR-46500 Afşin/Kahramanmaraş, Turkey

<sup>†</sup> Corresponding Author. E-Mail: okkesdemir@hotmail.com.

## 1. GPC analysis chromatograms of poly(4-PHEP)

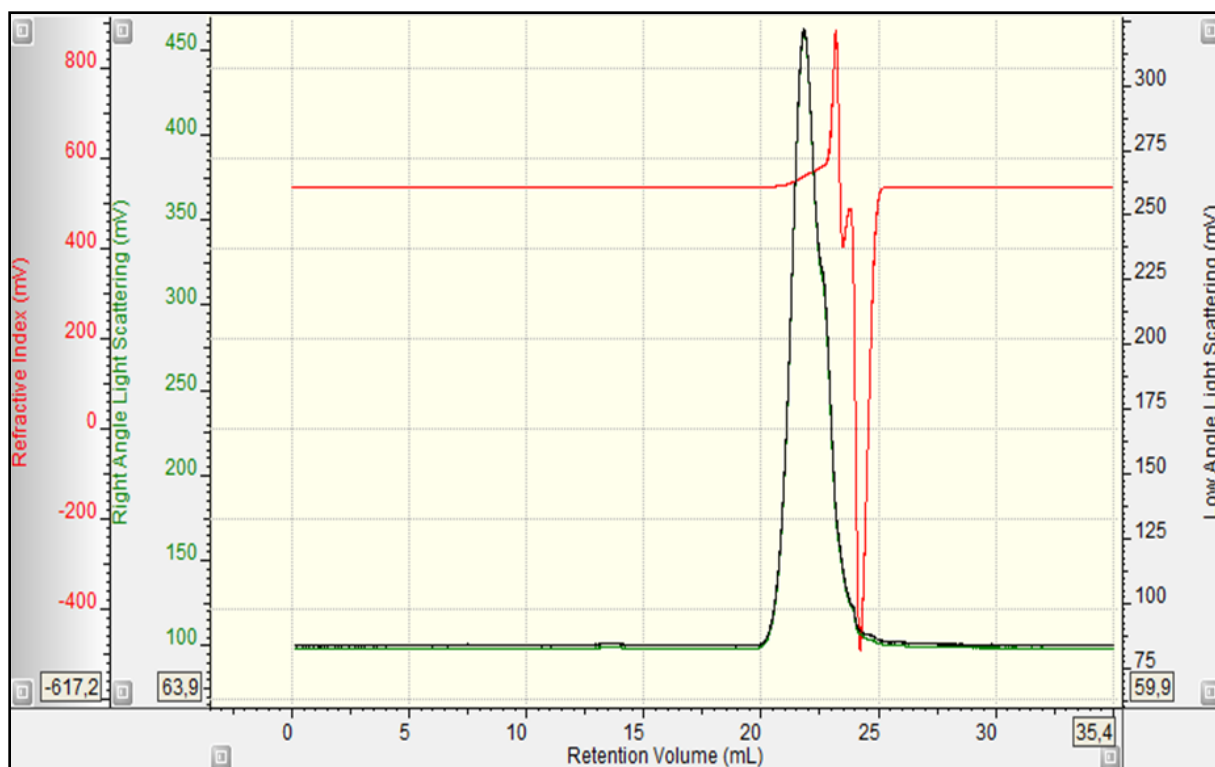

**Figure S1.** GPC analysis chromatograms of poly(4-PHEP) for NaOCl oxidant.

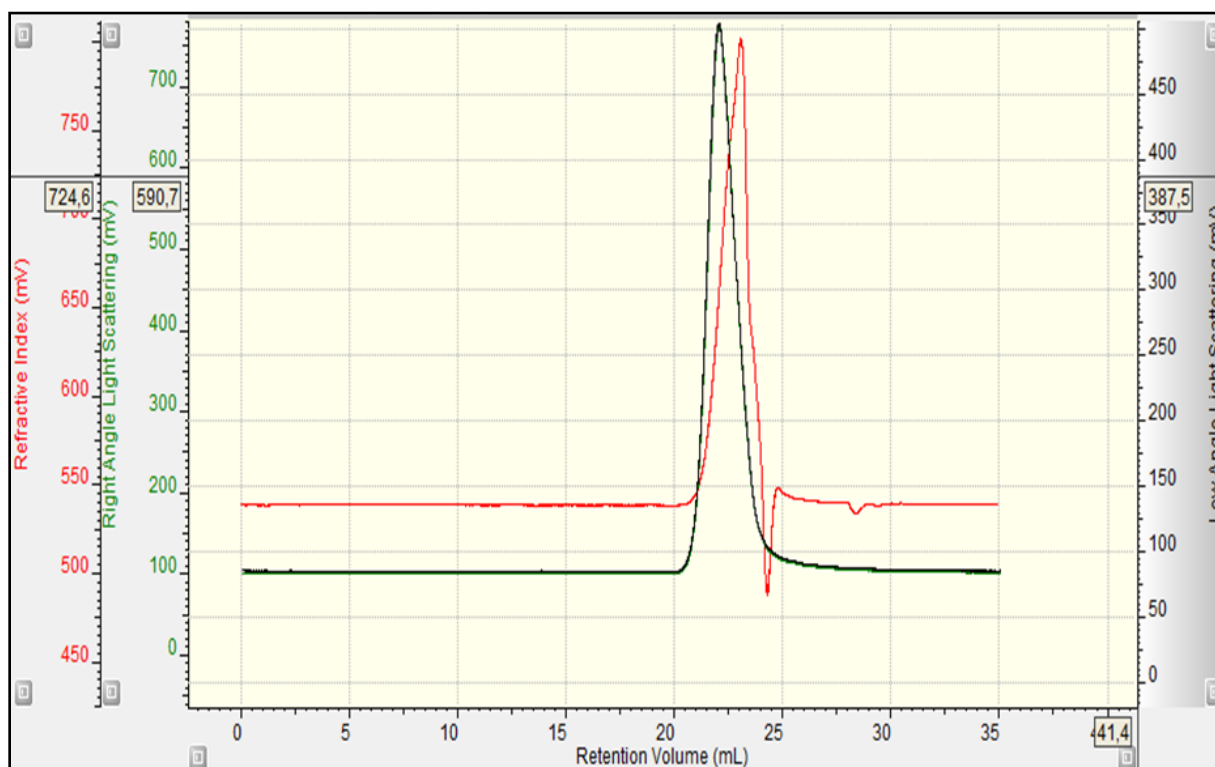

**Figure S2.** GPC analysis chromatograms of poly(4-PHEP) for atmospheric oxygen oxidant.

## 2. The ohmic and the rectifying (Schottky type) behavior for Au/poly(4-PHEP) and poly(4-PHEP)/p-Si structures

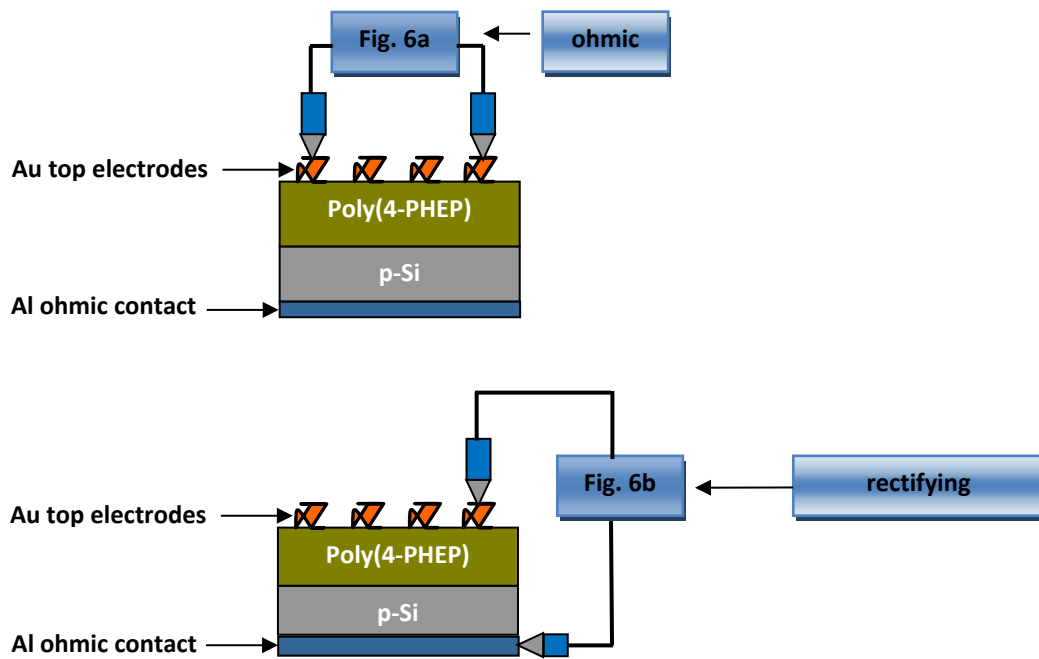

**Figure S3.** Apparatus for measurement technique to compare the current-voltage characteristics of Au/poly(4-PHEP) and poly(4-PHEP)/p-Si structures.
